# Supplementary material for: Analgesia Effect of Enteric Sustained-Release Tetrodotoxin Pellets in the Rat
Source: PubMed Central journal article supplement (PMC7022972; doi:10.3390/pharmaceutics12010032), 2020-01-01
Supplement: pharmaceutics-12-00032-s001.pdf [file pharmaceutics-12-00032-s001.pdf]

# Supplementary Materials: Analgesia Effect of Enteric Sustained-Release Tetrodotoxin Pellets in the Rat

Bihong Hong, Jianlin He, Jipeng Sun, Qingqing Le, Kaikai Bai, Yanhua Mou, Yiping Zhang, Weizhu Chen and Wenwen Huang

A

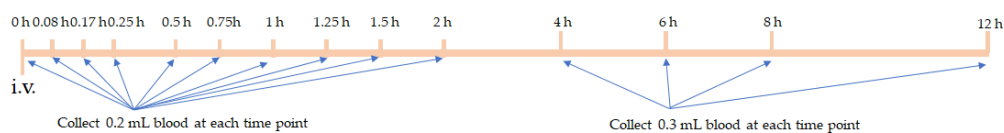

B

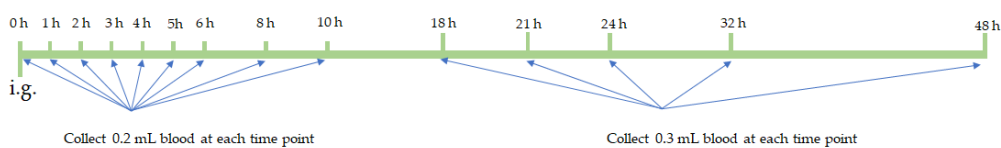

**Figure S1.** Blood collection schemes of (A) intravascular (i.v.) injection of 6 µg/kg TTX and (B) intragastrically (i.g.) administration of 150 µg/kg sustained-release TTX pellets. For each group, 6 rats (260 ± 20 g), half male and half female, with jugular vein catheterization (JVC), were included. Serial blood samples were collected in heparinized tubes via the jugular vein at different time points.
